# Supplementary material for: Sunglint Detection for Unmanned and Automated Platforms
Source: MDPI journal article supplement (doi:10.3390/s120912545), 2012-09-13
Supplement: s1 [file s1]

## Sheet: All
Sunglint Detection for Unmanned and Automated Platforms
Shungudzemwoyo Pascal Garaba 1* , Jan Schulz 1, Marcel Robert Wernand 2, and Oliver Zielinski 1
1	Institute for Chemistry and Biology of the Marine Environment - Terramare, Carl von Ossietzky University of Oldenburg, Schleusenstraße 1, 26382 Wilhelmshaven, Germany; shungu.garaba@uni-oldenburg.de; jan.schulz@uni-oldenburg.de; oliver.zielinski@uni-oldenburg.de
2	Royal Netherlands Institute for Sea Research, Physical Oceanography, Marine Optics & Remote Sensing, PO Box 59, 1790AB Den Burg, Texel, Netherlands; marcel.wernand@nioz.nl
1. To determine the sun's zenit and azimuthal angle use 1. Reda, I.; Andreas, A. Solar position algorithm for solar radiation applications. Solar Energy 2004, 76, 577-589. doi:10.1016/j.solener.2003.12.003
2. To determine ß use command MOD((Gx-Fx),360) where x is row number
DateTime	Latitute	Longitude	Ship Heading	Sun's Zenith	Sun's Azimuth	Sensor	Sun azimuth	Sun's Elevation	Wind Speed	Cloud
YYYYMMDDHHMM	North	East		angle	angle	85° to Ship	-sensor direction			Cover
						Heading	angle β			<0.05 clear
										>= 0.05 cloudy
	°, deg	°, deg	°, deg	°, deg	°, deg	°, deg	°, deg	°, deg	m/s
200904211131	53.84	8.09	132.6	41.8426	181.719	217.6	324.119	48.1574	2.88	0.0279815
200904211146	53.84	8.09	139.5	42.0112	187.203	224.5	322.703	47.9888	2.67	0.0320564
200904211201	53.84	8.09	139.9	42.3887	192.635	224.9	327.735	47.6113	2.73	0.037755
200904211216	53.84	8.09	140	42.9693	197.978	225	332.978	47.0307	3.29	0.0457758
200904211231	53.84	8.09	138.1	43.7438	203.201	223.1	340.101	46.2562	3.55	0.0509102
200904211246	53.84	8.09	139.2	44.7011	208.278	224.2	344.078	45.2989	3.19	0.073327
200904211301	53.84	8.08	108.6	45.8249	213.179	193.6	19.5787	44.1751	3.34	0.117811
200904211316	53.87	8.12	328.9	47.1457	217.951	53.9	164.051	42.8543	3.24	0.126718
200904211331	53.9	8.05	295.1	48.5642	222.408	20.1	202.308	41.4358	3.09	0.67311
200904211346	53.92	7.98	300.9	50.0953	226.699	25.9	200.799	39.9047	3.24	0.143227
200904211401	53.97	7.95	350	51.7708	230.85	75	155.85	38.2292	3.09	0.302295
200904211416	54.01	7.94	355.5	53.5435	234.866	80.5	154.366	36.4565	2.93	0.431266
200904211431	54.05	7.93	349.8	55.399	238.73	74.8	163.93	34.601	2.26	0.386911
200904211446	54.1	7.92	354	57.3305	242.449	79	163.449	32.6695	1.95	0.463796
200904211501	54.14	7.91	353.8	59.3172	246.048	78.8	167.248	30.6828	1.44	0.141832
200904211516	54.14	7.91	101.4	61.346	249.562	186.4	63.1622	28.654	1.23	0.169317
200904211531	54.14	7.91	89.6	63.4209	252.973	174.6	78.3731	26.5791	2.06	0.0296709
200904211546	54.15	7.91	91.3	65.5354	256.288	176.3	79.9885	24.4646	2.47	0.0467068
200904211601	54.15	7.92	98.9	67.682	259.538	183.9	75.6383	22.318	2.67	0.425228
200904211616	54.15	7.91	278.1	69.8388	262.704	3.1	259.604	20.1612	2.93	0.271459
200904211631	54.15	7.88	293.3	71.998	265.798	18.3	247.498	18.002	2.67	0.470078
200904211646	54.16	7.85	295.8	74.1647	268.844	20.8	248.044	15.8353	3.29	0.0225912
200904211701	54.17	7.82	300	76.3305	271.856	25	246.856	13.6695	3.7	0.615122
200904211716	54.18	7.79	315.9	78.4886	274.845	40.9	233.945	11.5114	5.2	0.591223
200904211731	54.2	7.77	327.9	80.6358	277.825	52.9	224.925	9.3642	5.81	0.782022
200904211746	54.21	7.76	327.7	82.765	280.809	52.7	228.109	7.23505	6.22	0.847895
200904211801	54.23	7.75	329.5	84.8544	283.795	54.5	229.295	5.14561	5.56	0.25802
200904211816	54.24	7.75	329.3	86.8912	286.8	54.3	232.5	3.10879	5.61	0.0550866
200904211831	54.26	7.74	330.2	88.8083	289.815	55.2	234.615	1.19171	4.42	0.436508
200904211846	54.27	7.73	329.6	90.5364	292.857	54.6	238.257	-0.536387	3.81	0.0675714
200904211901	54.29	7.71	329.6	92.7428	295.923	54.6	241.323	-2.74277	3.4	0.0736515
200904211916	54.31	7.7	329.4	95.1144	299.037	54.4	244.637	-5.11442	4.01	0.0741709
200904220746	54.55	7.04	294.2	60.6682	111.583	19.2	92.3826	29.3318	12.29	0.0915531
200904220816	54.58	6.92	296.7	56.8067	118.714	21.7	97.0143	33.1933	11.83	0.0899228
200904220831	54.6	6.86	296	54.9749	122.468	21	101.468	35.0251	11.99	0.0914094
200904220846	54.61	6.8	296.5	53.2155	126.355	21.5	104.855	36.7845	12.65	0.0900479
200904220901	54.63	6.74	296	51.551	130.396	21	109.396	38.449	13.99	0.0901111
200904220916	54.65	6.68	295.8	49.9877	134.593	20.8	113.793	40.0123	13.01	0.084417
200904220946	54.68	6.56	295.8	47.2066	143.471	20.8	122.671	42.7934	13.22	0.0840788
200904221001	54.7	6.5	295.7	46.0219	148.159	20.7	127.459	43.9781	13.32	0.0298443
200904221016	54.71	6.44	295.7	44.9803	152.999	20.7	132.299	45.0197	12.76	0.147225
200904221031	54.73	6.38	294.9	44.1114	157.989	19.9	138.089	45.8886	12.14	0.0719324
200904221046	54.73	6.37	296.9	43.3901	163.169	21.9	141.269	46.6099	13.07	0.316188
200904221101	54.73	6.36	296	42.8574	168.458	21	147.458	47.1426	11.52	0.256045
200904221501	54.97	5.58	297.5	58.1903	243.604	22.5	221.104	31.8097	6.94	0.218717
200904221516	54.98	5.52	296.5	60.1148	247.15	21.5	225.65	29.8852	8.59	0.337183
200904221531	54.99	5.49	299.5	62.1043	250.618	24.5	226.118	27.8957	7.87	0.0930253
200904221546	55	5.47	304.7	64.1402	254	29.7	224.3	25.8598	7.51	0.900023
200904221601	55	5.46	320.6	66.2123	257.312	45.6	211.712	23.7877	7.1	0.167138
200904221616	55	5.46	314	68.3165	260.56	39	221.56	21.6835	6.22	0.122673
200904221631	55	5.45	287.6	70.4339	263.737	12.6	251.137	19.5661	7.92	0.0706959
200904221701	55.02	5.43	331	74.6973	269.94	56	213.94	15.3027	4.99	0.154563
200904221716	55.03	5.43	330.9	76.8335	273	55.9	217.1	13.1665	6.38	0.0924952
200904221746	55.05	5.41	332.6	81.0559	279.047	57.6	221.447	8.94406	7.77	0.274252
200904221801	55.06	5.4	324	83.1308	282.06	49	233.06	6.8692	7.36	0.574805
200904221816	55.08	5.39	320.9	85.1625	285.077	45.9	239.177	4.8375	5.25	0.103834
200904230831	55.49	4.35	303.5	56.3527	120.265	28.5	91.7646	33.6473	4.42	0.0279861
200904230846	55.51	4.28	303.2	54.5973	124.071	28.2	95.8705	35.4027	4.94	0.0406687
200904230901	55.54	4.22	303.3	52.9244	128.029	28.3	99.7293	37.0756	6.28	0.00856546
200904230916	55.57	4.16	302.6	51.3447	132.133	27.6	104.533	38.6553	5.92	0.511233
200904230931	55.59	4.11	303.2	49.8586	136.394	28.2	108.194	40.1414	5.66	0.0106355
200904230946	55.6	4.07	140.3	48.4775	140.818	225.3	275.518	41.5225	6.38	0.400929
200904231001	55.6	4.07	160.3	47.2037	145.446	245.3	260.146	42.7963	6.74	0.4365
200904231016	55.59	4.07	160.7	46.0644	150.227	245.7	264.527	43.9356	7.25	0.123787
200904231031	55.59	4.07	296.2	45.0894	155.166	21.2	133.966	44.9106	7.41	0.383885
200904231046	55.62	4.02	313.7	44.32	160.183	38.7	121.483	45.68	7.25	0.160868
200904231101	55.65	3.96	312.5	43.7273	165.295	37.5	127.795	46.2727	7.61	0.162798
200904231116	55.69	3.89	307.4	43.3276	170.478	32.4	138.078	46.6724	8.8	0.262887
200904231131	55.72	3.82	307.1	43.1047	175.713	32.1	143.613	46.8953	8.18	0.363383
200904231146	55.75	3.76	308.4	43.0713	180.984	33.4	147.584	46.9287	8.38	0.533772
200904231201	55.78	3.69	307.2	43.228	186.228	32.2	154.028	46.772	9.46	1.05106
200904231216	55.81	3.62	308.2	43.5716	191.429	33.2	158.229	46.4284	9.26	0.846274
200904231231	55.84	3.56	307.3	44.0986	196.57	32.3	164.27	45.9014	9.46	0.565369
200904231246	55.87	3.49	308.3	44.7986	201.596	33.3	168.296	45.2014	9.67	0.533329
200904231301	55.91	3.42	308.4	45.6724	206.498	33.4	173.098	44.3276	9.67	0.444872
200904231316	55.92	3.4	144.6	46.6883	211.339	229.6	341.739	43.3117	10.39	0.145474
200904231331	55.92	3.4	164.1	47.8504	216.062	249.1	326.962	42.1496	9.83	0.221664
200904231346	55.91	3.41	124.1	49.1463	220.645	209.1	11.545	40.8537	10.6	0.342424
200904231401	55.92	3.42	87.2	50.5827	225.058	172.2	52.8577	39.4173	10.13	0.268205
200904231416	55.92	3.43	155.9	52.1243	229.319	240.9	348.419	37.8757	9.16	0.0814858
200904231431	55.93	3.37	285.4	53.7405	233.347	10.4	222.947	36.2595	10.75	0.0559923
200904231446	55.94	3.3	282.9	55.4363	237.227	7.9	229.327	34.5637	9.93	0.0532402
200904231501	55.96	3.22	287.4	57.2051	240.962	12.4	228.562	32.7949	10.19	0.0741968
200904231516	55.97	3.14	291.4	59.0315	244.584	16.4	228.184	30.9685	9.31	0.0842422
200904231531	55.99	3.06	289.8	60.9152	248.094	14.8	233.294	29.0848	10.03	0.0785844
200904231546	56.01	2.99	290.7	62.8481	251.517	15.7	235.817	27.1519	10.19	0.0924381
200904231601	56.03	2.91	289.5	64.8116	254.845	14.5	240.345	25.1884	10.19	0.155687
200904231616	56.05	2.84	290.9	66.8088	258.107	15.9	242.207	23.1912	9.93	0.140903
200904231631	56.07	2.76	290.4	68.8215	261.296	15.4	245.896	21.1785	10.49	0.166354
200904231646	56.08	2.69	282.9	70.8531	264.442	7.9	256.542	19.1469	10.85	0.192328
200904231701	56.09	2.61	276.3	72.8878	267.534	1.3	266.234	17.1122	11.06	0.252333
200904231716	56.09	2.6	172.4	74.9638	270.65	257.4	13.2498	15.0362	11.21	0.244172
200904231731	56.09	2.6	167.8	77.0418	273.745	252.8	20.9449	12.9582	10.7	0.216055
200904231746	56.09	2.61	167	79.1149	276.828	252	24.8276	10.8851	10.34	0.194136
200904231801	56.09	2.61	170.5	81.164	279.89	255.5	24.3901	8.83597	11.16	0.208708
200904231816	56.1	2.59	281.8	83.1727	282.931	6.8	276.131	6.8273	10.65	0.216918
200904231831	56.1	2.57	280.1	85.1431	285.978	5.1	280.878	4.85686	10.34	0.193966
200904231846	56.11	2.54	281.5	87.0437	289.028	6.5	282.528	2.95628	9.98	0.12221
200904231916	56.12	2.49	279.2	90.4556	295.198	4.2	290.998	-0.455562	10.24	0.107539
200904231931	56.13	2.46	276.4	92.4366	298.322	1.4	296.922	-2.43661	10.08	0.0909048
200904231946	56.14	2.43	276.8	94.7176	301.484	1.8	299.684	-4.71761	11.16	0.0923332
200904232001	56.14	2.39	277.6	96.4843	304.678	2.6	302.078	-6.48434	11.37	0.0822652
200904232016	56.15	2.36	276.3	98.1456	307.928	1.3	306.628	-8.14556	11.78	0.0855782
200904232046	56.16	2.29	278	101.243	314.573	3	311.573	-11.2434	12.5	0.0672807
200904240701	56.39	1.26	292.8	69.8423	96.9173	17.8	79.1173	20.1577	12.04	0.0707537
200904240716	56.41	1.19	279.8	67.8327	100.105	4.8	95.3052	22.1673	13.12	0.05018
200904240731	56.43	1.1	290.9	65.8554	103.337	15.9	87.437	24.1446	11.99	0.0377454
200904240746	56.45	1.03	294.7	63.8957	106.658	19.7	86.9578	26.1043	11.57	0.0259988
200904240801	56.47	0.95	280.2	61.9771	110.051	5.2	104.851	28.0229	10.13	0.0256252
200904240816	56.48	0.87	284.4	60.098	113.53	9.4	104.13	29.902	13.99	0.0427535
200904240831	56.5	0.8	283.1	58.2692	117.126	8.1	109.026	31.7308	12.55	0.0450414
200904240846	56.51	0.72	284	56.5008	120.818	9	111.818	33.4992	12.76	0.0504491
200904240901	56.53	0.64	290.1	54.8069	124.637	15.1	109.537	35.1931	12.86	0.0449632
200904240916	56.55	0.57	285.7	53.1884	128.596	10.7	117.896	36.8116	12.76	0.125383
200904240931	56.56	0.49	286.3	51.6579	132.676	11.3	121.376	38.3421	12.6	0.0802875
200904240946	56.58	0.41	283.5	50.2348	136.904	8.5	128.404	39.7652	13.73	0.0973314
200904241001	56.59	0.36	165.5	48.906	141.309	250.5	250.809	41.094	13.07	0.127527
200904241016	56.59	0.36	166.2	47.6784	145.919	251.2	254.719	42.3216	13.79	0.262223
200904241031	56.58	0.36	164.6	46.5819	150.674	249.6	261.074	43.4181	14.04	0.113119
200904241046	56.58	0.37	165.4	45.643	155.588	250.4	265.188	44.357	12.45	0.0818845
200904241101	56.59	0.33	301.7	44.8863	160.565	26.7	133.865	45.1137	11.73	0.0654657
200904241116	56.61	0.26	293.6	44.3129	165.608	18.6	147.008	45.6871	11.37	0.0516437
200904241131	56.63	0.19	294.6	43.9141	170.729	19.6	151.129	46.0859	10.91	0.0471844
200904241146	56.65	0.11	295	43.6954	175.886	20	155.886	46.3046	10.91	0.0396778
200904241201	56.67	0.04	296.3	43.6583	181.078	21.3	159.778	46.3417	11.88	0.0352556
200904241216	56.68	-0.04	293.7	43.7937	186.248	18.7	167.548	46.2063	11.01	0.024382
200904241231	56.7	-0.11	294.7	44.1198	191.392	19.7	171.692	45.8802	12.96	0.0207437
200904241246	56.72	-0.19	296.4	44.6204	196.454	21.4	175.054	45.3796	11.93	0.0209791
200904241301	56.74	-0.26	298.9	45.2911	201.437	23.9	177.537	44.7089	10.44	0.0104855
200904241316	56.76	-0.33	300.2	46.1224	206.308	25.2	181.108	43.8776	11.57	0.0107864
200904241331	56.78	-0.41	293.8	47.1012	211.038	18.8	192.238	42.8988	12.35	0.00822577
200904241346	56.78	-0.43	151.1	48.2217	215.715	236.1	339.615	41.7783	14.09	0.0086182
200904241401	56.78	-0.42	160.2	49.486	220.28	245.2	335.08	40.514	14.4	0.00858662
200904241416	56.78	-0.42	159.8	50.8695	224.683	244.8	339.883	39.1305	13.37	0.00757956
200904241431	56.78	-0.43	276.2	52.3592	228.924	1.2	227.724	37.6408	14.2	0.0222715
200904241446	56.79	-0.47	296.2	53.9396	232.984	21.2	211.784	36.0604	14.56	0.0275695
200904241501	56.8	-0.52	292.4	55.5996	236.898	17.4	219.498	34.4004	13.84	0.0288896
200904241516	56.81	-0.57	290.9	57.3329	240.686	15.9	224.786	32.6671	14.25	0.00671351
200904241531	56.83	-0.62	290.3	59.1338	244.353	15.3	229.053	30.8662	13.89	0.00601556
200904241546	56.84	-0.66	290	60.9889	247.928	15	232.928	29.0111	13.68	0.00579416
200904241601	56.85	-0.71	284.7	62.8845	251.398	9.7	241.698	27.1155	13.37	0.00671016
200904241616	56.87	-0.76	289.8	64.8199	254.778	14.8	239.978	25.1801	13.43	0.00691764
200904241631	56.89	-0.81	291.9	66.7836	258.084	16.9	241.184	23.2164	13.01	0.0072332
200904241646	56.9	-0.85	292.5	68.7724	261.338	17.5	243.838	21.2276	11.88	0.00814779
200904241701	56.92	-0.9	290.9	70.772	264.525	15.9	248.625	19.228	12.09	0.00881171
200904241716	56.94	-0.95	290.9	72.779	267.667	15.9	251.767	17.221	12.81	0.0265012
200904241731	56.95	-1	292.4	74.7872	270.775	17.4	253.375	15.2128	12.14	0.0212016
200904241746	56.97	-1.04	291.1	76.7956	273.863	16.1	257.763	13.2044	12.5	0.0225079
200904241801	56.98	-1.07	161.7	78.7983	276.941	246.7	30.241	11.2017	11.88	0.0252831
200904241816	56.98	-1.07	162.6	80.8001	280.034	247.6	32.4341	9.19986	11.57	0.0137879
200904241831	56.99	-1.07	162.9	82.7733	283.121	247.9	35.2214	7.22667	12.24	0.0139893
200904241846	56.99	-1.07	161.6	84.7105	286.213	246.6	39.6131	5.2895	12.6	0.0166599
200904241901	56.99	-1.07	161.6	86.5918	289.315	246.6	42.7149	3.40816	12.19	0.0185025
200904241916	56.99	-1.06	167.4	88.3856	292.442	252.4	40.042	1.61444	12.24	0.022018
200904241931	56.99	-1.06	163.7	90.0097	295.584	248.7	46.884	-0.00967047	11.57	0.0553909
200904241946	56.98	-1.06	163	91.7107	298.755	248	50.755	-1.71068	12.65	0.266399
200904242001	56.98	-1.06	160.6	94.0214	301.961	245.6	56.3609	-4.02137	12.29	0.295783
200904242046	56.97	-1.05	161.4	99.0662	311.843	246.4	65.4427	-9.06618	12.55	0.395836
200904250731	56.98	-1.28	283.9	66.951	101.302	8.9	92.4023	23.049	4.12	0.183618
200904250746	56.99	-1.34	284.3	64.9943	104.6	9.3	95.3	25.0057	4.32	0.326048
200904250801	57.01	-1.39	284.5	63.0657	107.986	9.5	98.4861	26.9343	3.7	0.253988
200904250816	57.02	-1.45	283.4	61.1775	111.443	8.4	103.043	28.8225	5.04	0.380328
200904250831	57.03	-1.5	283.4	59.33	115.004	8.4	106.604	30.67	6.12	0.206443
200904250846	57.04	-1.56	287.6	57.5417	118.661	12.6	106.061	32.4583	2.98	0.258032
200904250901	57.05	-1.62	287.8	55.8166	122.431	12.8	109.631	34.1834	4.42	0.218356
200904250916	57.07	-1.67	291.9	54.1659	126.342	16.9	109.442	35.8341	3.86	0.283307
200904250931	57.08	-1.73	289.6	52.5974	130.369	14.6	115.769	37.4026	3.86	0.239929
200904250946	57.09	-1.78	291	51.1187	134.545	16	118.545	38.8813	2.16	0.0319648
200904251001	57.1	-1.83	148.7	49.7453	138.864	233.7	265.164	40.2547	2.57	0.0351712
200904251031	57.09	-1.82	115.7	47.303	148.06	200.7	307.36	42.697	3.09	0.00900547
200904251046	57.09	-1.82	116.2	46.2958	152.872	201.2	311.672	43.7042	2.98	0.00859476
200904251101	57.09	-1.84	302.7	45.447	157.789	27.7	130.089	44.553	3.03	0.0426444
200904251116	57.1	-1.87	309.5	44.7721	162.81	34.5	128.31	45.2279	3.6	0.178692
200904251131	57.11	-1.91	310.2	44.2693	167.909	35.2	132.709	45.7307	3.81	0.362838
200904251146	57.12	-1.95	310.5	43.9431	173.076	35.5	137.576	46.0569	3.91	0.333698
200904251201	57.13	-1.98	320.6	43.7978	178.295	45.6	132.695	46.2022	4.06	0.269698
200904251216	57.15	-2.01	318.3	43.8464	183.522	43.3	140.222	46.1536	3.65	0.288833
200904251246	57.15	-2.05	352.6	44.4531	193.913	77.6	116.313	45.5469	4.22	0.0645385
200904251301	57.14	-2.07	241.8	45.0134	199.008	326.8	232.208	44.9866	5.61	0.341076
200904251316	57.15	-2.09	259.4	45.7609	203.997	344.4	219.597	44.2391	3.29	0.340018
200904251331	57.15	-2.09	259.6	46.6631	208.894	344.6	224.294	43.3369	2.01	0.287017
200904251346	57.15	-2.09	259.6	47.7155	213.656	344.6	229.056	42.2845	1.85	0.3469
200904251401	57.15	-2.09	259.7	48.9063	218.274	344.7	233.574	41.0937	1.08	0.326788
200904251416	57.15	-2.09	259.7	50.2238	222.744	344.7	238.044	39.7762	0.36	0.32819
200904251431	57.15	-2.09	259.6	51.6558	227.065	344.6	242.465	38.3442	1.34	0.307472
200904251446	57.15	-2.09	259.5	53.1904	231.241	344.5	246.741	36.8096	1.29	0.277329
200904251501	57.15	-2.09	259.5	54.8162	235.278	344.5	250.778	35.1838	2.16	0.257376
200904270816	55.85	-0.96	138.1	59.9168	110.976	223.1	247.876	30.0832	10.91	0.168144
200904270831	55.88	-0.99	320.1	58.0028	114.556	45.1	69.4562	31.9972	12.86	0.113102
200904270846	55.92	-1.05	313	56.1663	118.228	38	80.2283	33.8337	12.91	0.0561551
200904270901	55.95	-1.11	311.3	54.3922	122.02	36.3	85.72	35.6078	10.24	0.0116879
200904270916	55.99	-1.17	310.9	52.7007	125.953	35.9	90.0534	37.2993	11.99	0.0115034
200904270931	56.03	-1.24	310.7	51.102	130.02	35.7	94.3203	38.898	11.68	0.00940313
200904270946	56.06	-1.3	310.6	49.5915	134.244	35.6	98.6436	40.4085	11.32	0.00901189
200904271001	56.1	-1.37	309.4	48.2028	138.618	34.4	104.218	41.7972	10.96	0.00843663
200904271016	56.13	-1.43	311.9	46.9258	143.156	36.9	106.256	43.0742	12.19	0.00843754
200904271031	56.17	-1.49	311.2	45.7921	147.856	36.2	111.656	44.2079	11.57	0.0075716
200904271046	56.17	-1.5	145.1	44.7578	152.753	230.1	282.653	45.2422	10.8	0.00747404
200904271116	56.17	-1.5	138.9	43.1785	162.994	223.9	299.094	46.8215	11.83	0.00640299
200904271131	56.17	-1.49	138.8	42.6564	168.297	223.8	304.497	47.3436	10.91	0.00622806
200904271146	56.17	-1.48	43.6	42.3253	173.677	128.6	45.077	47.6747	10.91	0.00600841
200904271201	56.21	-1.49	350.4	42.2303	179.071	75.4	103.671	47.7697	10.19	0.00600305
200904271231	56.31	-1.5	358.3	42.6462	189.83	83.3	106.53	47.3538	10.75	0.00619881
200904271246	56.35	-1.5	358	43.1311	195.128	83	112.128	46.8689	10.6	0.00629538
200904271301	56.4	-1.5	359.4	43.8075	200.322	84.4	115.922	46.1925	9.67	0.00713889
200904271316	56.44	-1.5	1.8	44.6465	205.395	86.8	118.595	45.3535	9.77	0.0779131
200904271331	56.48	-1.5	0.5	45.6466	210.325	85.5	124.825	44.3534	9.16	0.0172283
200904271346	56.53	-1.5	1.9	46.8033	215.096	86.9	128.196	43.1967	9.62	0.0156971
200904271416	56.6	-1.5	119.5	49.4857	224.172	204.5	19.6716	40.5143	9.1	0.0123059
200904271431	56.6	-1.5	104.6	50.975	228.49	189.6	38.8903	39.025	9.67	0.0117119
200904271446	56.6	-1.49	107.1	52.5699	232.667	192.1	40.5666	37.4301	9.31	0.0122478
200904271501	56.6	-1.49	119.6	54.25	236.685	204.6	32.0853	35.75	8.38	0.0144579
200904271516	56.59	-1.49	114.2	56.0032	240.573	199.2	41.3729	33.9968	7.56	0.0184896
200904271546	56.65	-1.44	15.7	59.761	247.982	100.7	147.282	30.239	8.44	0.0197724
200904271601	56.69	-1.42	16	61.7131	251.515	101	150.515	28.2869	9.1	0.0311134
200904271631	56.77	-1.37	16.9	65.7202	258.328	101.9	156.428	24.2798	8.9	0.0302042
200904271646	56.82	-1.35	19.5	67.7555	261.618	104.5	157.118	22.2445	8.74	0.202991
200904271701	56.86	-1.32	20.8	69.8062	264.864	105.8	159.064	20.1938	9.05	0.221335
200904272001	57.16	-1.16	356.8	92.7965	302.446	81.8	220.646	-2.79652	8.38	0.174573
200904272016	57.18	-1.17	357.6	94.8771	305.672	82.6	223.072	-4.87714	8.9	0.176908
200904272031	57.2	-1.17	353.1	96.4964	308.95	78.1	230.85	-6.4964	8.28	0.190323
200904272046	57.22	-1.17	354.6	98.0221	312.275	79.6	232.675	-8.02211	8.02	0.218899
200904281746	58.68	-1.7	64.4	75.3509	273.741	149.4	124.341	14.6491	6.84	0.154728
200904281801	58.68	-1.69	88.2	77.2848	276.912	173.2	103.712	12.7152	6.02	0.133356
200904281816	58.69	-1.72	279.9	79.1809	280.031	4.9	275.131	10.8191	6.02	0.0991185
200904281831	58.69	-1.77	275.9	81.0455	283.128	0.9	282.228	8.95448	6.69	0.147324
200904281846	58.7	-1.82	276	82.8773	286.222	1	285.222	7.12274	5.97	0.146989
200904281916	58.71	-1.92	275.9	86.4061	292.435	0.9	291.535	3.59395	7.1	0.123224
200904281931	58.72	-1.96	275.6	88.0625	295.573	0.6	294.973	1.93754	7.05	0.100299
200904281946	58.73	-2.01	268.5	89.5787	298.726	353.5	305.226	0.421303	6.74	0.111738
200904282001	58.73	-2.05	269.8	90.9925	301.914	354.8	307.114	-0.992467	6.48	0.101086
200904290746	58.98	-2.5	19.2	64.9233	103.842	104.2	359.642	25.0767	8.9	0.0810473
200904290801	59.02	-2.47	21.7	63.0589	107.355	106.7	0.655068	26.9411	8.64	0.0457204
200904290831	59.12	-2.4	20.6	59.4626	114.663	105.6	9.06311	30.5374	8.9	0.0691863
200904290846	59.16	-2.37	20.1	57.7451	118.457	105.1	13.3572	32.2549	8.85	0.0905742
200904290901	59.2	-2.33	21.9	56.0895	122.373	106.9	15.4732	33.9105	9.52	0.060477
200904290916	59.25	-2.3	7.8	54.5201	126.404	92.8	33.604	35.4799	9.41	0.0445022
200904290931	59.29	-2.28	13.4	53.035	130.544	98.4	32.1438	36.965	10.08	0.0896479
200904290946	59.34	-2.26	4.8	51.6526	134.819	89.8	45.0191	38.3474	9.93	0.114511
200904291001	59.38	-2.25	353.2	50.3732	139.209	78.2	61.0092	39.6268	8.8	0.172802
200904291016	59.42	-2.27	320.9	49.2188	143.694	45.9	97.7944	40.7812	9.93	0.117479
200904291031	59.43	-2.33	291.1	48.1741	148.242	16.1	132.142	41.8259	9.83	0.141733
200904291046	59.44	-2.39	280.2	47.2583	152.908	5.2	147.708	42.7417	8.9	0.14818
200904291116	59.46	-2.53	284.3	45.8526	162.532	9.3	153.232	44.1474	8.74	0.18361
200904291146	59.47	-2.62	48.1	45.0434	172.536	133.1	39.4358	44.9566	9.05	0.153204
200904291201	59.47	-2.61	66.6	44.8773	177.68	151.6	26.0799	45.1227	8.69	0.134185
200904291216	59.47	-2.59	74.4	44.883	182.85	159.4	23.4501	45.117	9.41	0.101969
200904291231	59.46	-2.57	75.2	45.051	188.007	160.2	27.8073	44.949	9.16	0.0847416
200904291246	59.46	-2.55	74.2	45.3989	193.123	159.2	33.923	44.6011	9.83	0.0820463
200904291301	59.45	-2.61	261.8	45.8901	198.07	346.8	211.27	44.1099	9.05	0.0794554
200904291316	59.44	-2.69	260.2	46.5303	202.91	345.2	217.71	43.4697	9.05	0.0825359
200904291331	59.44	-2.77	269	47.3236	207.648	354	213.648	42.6764	8.85	0.127139
200904291346	59.43	-2.85	264	48.2435	212.281	349	223.281	41.7565	9.36	0.186083
200904291401	59.42	-2.93	233.5	49.29	216.794	318.5	258.294	40.71	8.44	0.163845
200904291416	59.39	-3	229.1	50.4417	221.206	314.1	267.106	39.5583	8.9	0.177496
200904291946	58.97	-3.65	141.1	88.5955	297.499	226.1	71.399	1.40452	10.55	0.165792
200904301216	57.66	-6.92	275.3	42.7736	176.842	0.3	176.542	47.2264	6.53	0.0981353
200904301231	57.66	-6.92	280	42.7533	182.18	5	177.18	47.2467	5.35	0.167228
200904301246	57.66	-6.92	272.9	42.9194	187.504	357.9	189.604	47.0806	5.45	0.202033
200904301301	57.66	-6.92	270.9	43.2694	192.783	355.9	196.883	46.7306	5.86	0.161124
200904301316	57.65	-6.93	233.3	43.7872	197.977	318.3	239.677	46.2128	4.99	0.199446
200904301331	57.65	-6.94	242.8	44.4854	203.069	327.8	235.269	45.5146	6.22	0.236175
200904301346	57.63	-6.95	186.6	45.3276	208.049	271.6	296.449	44.6724	5.97	0.198252
200904301401	57.58	-6.96	186.7	46.2974	212.912	271.7	301.212	43.7026	4.78	0.33254
200904301416	57.53	-6.97	188.2	47.4118	217.631	273.2	304.431	42.5882	6.22	0.419559
200904301431	57.49	-6.98	184.8	48.6665	222.196	269.8	312.396	41.3335	5.35	0.057196
200904301446	57.44	-6.99	184.4	50.0345	226.614	269.4	317.214	39.9655	5.09	0.0472698
200904301501	57.39	-7	185.8	51.512	230.882	270.8	320.082	38.488	4.37	0.0420359
200904301531	57.29	-7.02	182	54.7499	238.986	267	331.986	35.2501	4.37	0.0331237
200904301546	57.25	-7.03	183.6	56.4932	242.83	268.6	334.23	33.5068	5.09	0.0296247
200904301631	57.1	-7.06	188.2	62.0685	253.694	273.2	340.494	27.9315	4.94	0.0451007
200904301646	57.06	-7.07	187.7	64.02	257.116	272.7	344.416	25.98	4.84	0.0554925
200904301701	57.01	-7.09	187.8	65.9953	260.454	272.8	347.654	24.0047	5.71	0.062299
200904301716	56.97	-7.1	183.1	68.0015	263.728	268.1	355.628	21.9985	5.97	0.0647825
200904301731	56.92	-7.1	183.1	70.0289	266.957	268.1	358.857	19.9711	5.25	0.240686
200904301746	56.88	-7.11	182.6	72.0616	270.124	267.6	2.52375	17.9384	5.09	0.0591397
200904301801	56.83	-7.12	183.5	74.0977	273.255	268.5	4.75456	15.9023	4.73	0.145205
200904301816	56.79	-7.13	184	76.13	276.352	269	7.35203	13.87	4.06	0.311256
200904301831	56.77	-7.13	206.5	78.1541	279.432	291.5	347.932	11.8459	4.63	0.303445
200904301846	56.77	-7.13	174.5	80.1542	282.497	259.5	22.997	9.84585	5.04	0.230056
200904301901	56.77	-7.13	183	82.1245	285.559	268	17.5593	7.87552	5.4	0.121451
200904301916	56.77	-7.13	182.4	84.0552	288.627	267.4	21.2266	5.94483	6.33	0.0351224
200904301931	56.75	-7.15	210.3	85.929	291.69	295.3	356.39	4.07097	7.36	0.0618866
200904301946	56.71	-7.19	207.8	87.7233	294.755	292.8	1.95535	2.27667	7.51	0.106277
200904302001	56.68	-7.22	207.8	89.386	297.85	292.8	5.05009	0.61398	7.77	0.392522
200904302016	56.64	-7.26	207.7	90.9075	300.964	292.7	8.26419	-0.907457	8.28	0.326101
200904302031	56.6	-7.3	210.5	93.0021	304.111	295.5	8.61091	-3.00208	7.97	0.228551
200904302046	56.57	-7.34	206.3	95.054	307.296	291.3	15.9958	-5.05398	8.64	0.222841
200905011201	55.12	-5.55	110.9	40.0588	173.142	195.9	337.242	49.9412	8.54	0.185429
200905011216	55.1	-5.47	115.6	39.8835	178.889	200.6	338.289	50.1165	7.25	0.245601
200905011231	55.08	-5.42	168.1	39.9267	184.605	253.1	291.505	50.0733	4.78	0.184891
200905011246	55.08	-5.41	179.7	40.2013	190.226	264.7	285.526	49.7987	7.41	0.184543
200905011301	55.08	-5.41	189.2	40.6807	195.755	274.2	281.555	49.3193	6.17	0.1996
200905011316	55.07	-5.4	179.9	41.3501	201.19	264.9	296.29	48.6499	4.84	0.162839
200905011331	55.06	-5.4	173.5	42.2053	206.469	258.5	307.969	47.7947	10.55	0.129097
200905011346	55.04	-5.39	173.6	43.2299	211.602	258.6	313.002	46.7701	5.56	0.0657581
200905011401	54.99	-5.38	174.7	44.3934	216.574	259.7	316.874	45.6066	2.31	0.041811
200905011416	54.94	-5.37	174.2	45.7086	221.361	259.2	322.161	44.2914	1.03	0.0564927
200905011431	54.89	-5.37	174.1	47.1568	225.948	259.1	326.848	42.8432	1.85	0.0299341
200905011446	54.85	-5.36	174	48.7382	230.354	259	331.354	41.2618	1.49	0.0569003
200905011501	54.81	-5.35	174.3	50.4275	234.58	259.3	335.28	39.5725	0.36	0.0278849
200905011516	54.78	-5.34	176.7	52.2168	238.629	261.7	336.929	37.7832	1.44	0.0524826
200905011646	54.73	-5.31	175.9	64.2927	259.99	260.9	359.09	25.7073	2.67	0.0617937
200905011701	54.71	-5.31	182.5	66.4263	263.208	267.5	355.708	23.5737	5.71	0.151918
200905011716	54.69	-5.32	184	68.57	266.352	269	357.352	21.43	6.94	0.102763
200905011731	54.68	-5.32	177.8	70.7283	269.448	262.8	6.64808	19.2717	6.33	0.217453
200905011801	54.66	-5.32	178	75.0415	275.523	263	12.5226	14.9585	3.91	0.305416
200905011816	54.65	-5.33	178.1	77.1775	278.513	263.1	15.4131	12.8225	5.81	0.238904
200905011831	54.64	-5.33	177.2	79.3	281.498	262.2	19.2981	10.7	6.28	0.0791277
200905011846	54.63	-5.33	177.7	81.3956	284.478	262.7	21.7781	8.60443	7.3	0.0142953
200905011931	54.6	-5.33	178.4	87.396	293.467	263.4	30.0675	2.60404	4.89	0.0222077
200905012016	54.57	-5.34	172.2	93.0375	302.671	257.2	45.4714	-3.03746	4.58	0.124288
200905012031	54.55	-5.33	171.9	95.217	305.828	256.9	48.9282	-5.21695	5.97	0.0706423
200905012046	54.54	-5.33	172.7	96.9477	309.025	257.7	51.3249	-6.94772	9.88	0.467912
200905020731	54.2	-5.52	223.1	67.0009	95.332	308.1	147.232	22.9991	6.89	0.472853
200905020746	54.17	-5.58	222.9	64.8548	98.4249	307.9	150.525	25.1452	7.77	0.281556
200905020801	54.14	-5.63	223	62.7166	101.593	308	153.593	27.2834	6.48	0.195268
200905020816	54.11	-5.68	223.6	60.5991	104.841	308.6	156.241	29.4009	6.84	0.211544
200905020831	54.07	-5.74	223.2	58.5126	108.167	308.2	159.967	31.4874	7.3	0.187634
200905020846	54.05	-5.77	241.9	56.4523	111.639	326.9	144.739	33.5477	6.02	0.120612
200905020901	54.05	-5.78	222.4	54.4372	115.266	307.4	167.866	35.5628	5.71	0.0305447
200905020916	54.05	-5.78	222.1	52.4773	119.045	307.1	171.945	37.5227	4.58	0.329207
200905020931	54.05	-5.78	222.1	50.5891	122.98	307.1	175.88	39.4109	4.89	0.362006
200905020946	54.04	-5.78	199.4	48.7789	127.079	284.4	202.679	41.2211	4.68	0.305628
200905021001	53.99	-5.81	200.3	47.0514	131.299	285.3	205.999	42.9486	3.86	0.183403
200905021016	53.95	-5.84	196.6	45.4349	135.72	281.6	214.12	44.5651	4.27	0.161569
200905021031	53.9	-5.87	197.1	43.9307	140.338	282.1	218.238	46.0693	4.99	0.129023
200905021046	53.86	-5.89	196.3	42.5659	145.184	281.3	223.884	47.4341	5.04	0.200722
200905021101	53.82	-5.92	196.3	41.3569	150.226	281.3	228.926	48.6431	4.37	0.0361915
200905021116	53.77	-5.94	192.4	40.3043	155.477	277.4	238.077	49.6957	3.14	0.0213295
200905021131	53.72	-5.96	192.4	39.4357	160.913	277.4	243.513	50.5643	2.26	0.0609833
200905021146	53.68	-5.98	196	38.7751	166.512	281	245.512	51.2249	4.78	0.0120241
200905021201	53.65	-6	56.9	38.335	172.235	141.9	30.3348	51.665	6.69	0.038609
200905021216	53.66	-6	52	38.154	178.066	137	41.0656	51.846	5.71	0.0206919
200905021231	53.66	-6	149.6	38.1893	183.913	234.6	309.313	51.8107	6.64	0.0346215
200905021246	53.65	-6	150.1	38.4402	189.728	235.1	314.628	51.5598	7.36	0.031677
200905021301	53.65	-5.99	156.4	38.9233	195.473	241.4	314.073	51.0767	7.1	0.0479697
200905021316	53.61	-5.97	154.9	39.5841	201.122	239.9	321.222	50.4159	8.08	0.282969
200905021331	53.57	-5.94	154.7	40.4525	206.628	239.7	326.928	49.5475	8.54	0.270555
200905021346	53.55	-5.92	157.6	41.5269	211.922	242.6	329.322	48.4731	9.16	0.310181
200905021401	53.55	-5.92	157.4	42.7838	216.969	242.4	334.569	47.2162	10.55	0.272616
200905021416	53.55	-5.91	169.8	44.1981	221.815	254.8	327.015	45.8019	11.57	0.265881
200905021446	53.56	-5.91	170.9	47.4208	230.839	255.9	334.939	42.5792	11.37	0.275056
200905021501	53.54	-5.91	183	49.1833	235.067	268	327.067	40.8167	11.16	0.272492
200905021531	53.48	-5.92	180.5	52.9631	242.988	265.5	337.488	37.0369	10.75	0.307431
200905021546	53.45	-5.92	179.4	54.967	246.714	264.4	342.314	35.033	11.01	0.442203
200905021601	53.42	-5.92	179.3	57.0302	250.299	264.3	345.999	32.9698	9.98	0.397901
200905021616	53.39	-5.93	225.4	59.1371	253.75	310.4	303.35	30.8629	9.88	0.376601
200905021631	53.37	-5.97	231.1	61.2687	257.061	316.1	300.961	28.7313	10.6	0.188451
200905021646	53.36	-6.01	233	63.432	260.273	318	302.273	26.568	10.7	0.195871
200905021701	53.34	-6.06	243	65.6096	263.403	328	295.403	24.3904	9.46	0.260456
200905021716	53.34	-6.12	271.4	67.7976	266.449	356.4	270.049	22.2024	8.23	0.261991
200905021731	53.34	-6.18	264.7	69.9921	269.443	349.7	279.743	20.0079	5.4	0.344006
200905021801	53.35	-6.21	274.7	74.4274	275.38	359.7	275.68	15.5726	8.02	0.28364
200905021846	53.35	-6.21	274.1	80.991	284.175	359.1	285.075	9.00896	4.22	0.200478
200905021901	53.35	-6.21	274.1	83.1171	287.103	359.1	288.003	6.88285	3.4	0.283493
200905021916	53.35	-6.21	274.2	85.193	290.043	359.2	290.843	4.80702	4.94	0.339087
200905021931	53.35	-6.21	274.3	87.194	293.003	359.3	293.703	2.80603	5.3	0.11779
200905041731	52.61	-5.99	204.5	69.6809	270.289	289.5	340.789	20.3191	11.06	0.108854
200905051046	51.99	-6.91	237.1	40.5902	142.174	322.1	180.074	49.4098	11.93	0.199179
200905051101	51.98	-6.92	235.4	39.2508	147.36	320.4	186.96	50.7492	13.01	0.219887
200905051116	51.98	-6.92	235.4	38.0963	152.814	320.4	192.414	51.9037	12.45	0.147439
200905051131	51.98	-6.94	252.4	37.1459	158.467	337.4	181.067	52.8541	13.84	0.0845078
200905051146	51.97	-6.99	249.7	36.4053	164.265	334.7	189.565	53.5947	10.55	0.115561
200905051201	51.96	-7.04	249	35.8892	170.22	334	196.22	54.1108	12.09	0.156873
200905051216	51.95	-7.08	244.6	35.6079	176.294	329.6	206.694	54.3921	11.68	0.0287268
200905051231	51.94	-7.12	244.8	35.5691	182.41	329.8	212.61	54.4309	13.22	0.0387754
200905051246	51.93	-7.15	244.5	35.7747	188.521	329.5	219.021	54.2253	12.35	0.0833279
200905051301	51.92	-7.17	236.6	36.2222	194.563	321.6	232.963	53.7778	13.84	0.114131
200905051316	51.92	-7.18	230.5	36.9136	200.473	315.5	244.973	53.0864	13.63	0.0827952
200905051331	51.92	-7.18	235.1	37.827	206.207	320.1	246.107	52.173	14.51	0.111851
200905051346	51.92	-7.18	232.4	38.944	211.714	317.4	254.314	51.056	14.4	0.0250652
200905051401	51.91	-7.17	232.3	40.2415	216.997	317.3	259.697	49.7585	14.04	0.115091
200905051416	51.91	-7.21	252.5	41.6934	221.954	337.5	244.454	48.3066	15.43	0.349943
200905051431	51.9	-7.25	251.8	43.282	226.671	336.8	249.871	46.718	15.23	0.0287235
200905051446	51.89	-7.3	242.1	44.9929	231.139	327.1	264.039	45.0071	14.15	0.0448344
200905051501	51.88	-7.33	244.2	46.8238	235.406	329.2	266.206	43.1762	16.1	0.346324
200905051516	51.87	-7.38	245.1	48.7397	239.442	330.1	269.342	41.2603	12.76	0.137597
200905051531	51.86	-7.42	245.2	50.7421	243.3	330.2	273.1	39.2579	16.46	0.00759482
200905051546	51.85	-7.43	234.6	52.8302	247.014	319.6	287.414	37.1698	14.66	0.00755578
200905051601	51.85	-7.43	236.1	54.9856	250.576	321.1	289.476	35.0144	13.73	0.00716196
200905051616	51.85	-7.43	233.5	57.1879	254.002	318.5	295.502	32.8121	13.58	0.0203717
200905051631	51.85	-7.44	242.8	59.4214	257.299	327.8	289.499	30.5786	13.22	0.0272296
200905051646	51.84	-7.45	246.9	61.6817	260.499	331.9	288.599	28.3183	13.84	0.0602832
200905051716	51.84	-7.47	246.5	66.2612	266.64	331.5	295.14	23.7388	14.61	0.0135444
200905051731	51.84	-7.48	252.4	68.564	269.615	337.4	292.215	21.436	14.81	0.0139844
200905051746	51.84	-7.49	251.9	70.8666	272.542	336.9	295.642	19.1334	15.07	0.179767
200905051801	51.84	-7.5	247.8	73.1627	275.434	332.8	302.634	16.8373	15.53	0.145495
200905051816	51.84	-7.51	249.5	75.4459	278.299	334.5	303.799	14.5541	13.79	0.308202
200905051831	51.83	-7.53	250.4	77.7056	281.144	335.4	305.744	12.2944	13.63	0.358487
200905051846	51.83	-7.54	249.5	79.9435	283.989	334.5	309.489	10.0565	13.53	0.197588
200905051931	51.82	-7.56	238.9	86.4038	292.58	323.9	328.68	3.59622	12.6	0.385347
200905051946	51.82	-7.57	242.4	88.3873	295.483	327.4	328.083	1.6127	13.12	0.382583
200905052001	51.82	-7.58	230.8	90.173	298.421	315.8	342.621	-0.172951	13.22	0.0481225
200905052016	51.82	-7.58	240.7	92.1986	301.407	325.7	335.707	-2.19861	13.99	0.0403973
200905052031	51.81	-7.58	238.2	94.6979	304.439	323.2	341.239	-4.6979	12.91	0.0328036
200905052046	51.81	-7.59	237.9	96.6068	307.516	322.9	344.616	-6.60678	11.93	0.0297339
200905061246	51.45	-7.8	156.3	34.9652	187.62	241.3	306.32	55.0348	14.2	0.0251141
200905061301	51.42	-7.77	153.9	35.3722	193.87	238.9	314.97	54.6278	13.32	0.0219814
200905061316	51.4	-7.76	218.7	36.0322	199.94	303.7	256.24	53.9678	13.12	0.018278
200905061331	51.4	-7.76	226.4	36.9384	205.787	311.4	254.387	53.0616	12.96	0.0168677
200905061346	51.39	-7.76	223.1	38.0466	211.403	308.1	263.303	51.9534	13.73	0.0159161
200905061401	51.41	-7.78	310.5	39.3635	216.712	35.5	181.212	50.6365	15.59	0.015936
200905061416	51.44	-7.82	308.5	40.8462	221.72	33.5	188.22	49.1538	15.12	0.0143015
200905061431	51.47	-7.87	307	42.4687	226.453	32	194.453	47.5313	15.48	0.013498
200905061446	51.49	-7.91	306	44.2146	230.958	31	199.958	45.7854	14.71	0.0124168
200905061501	51.52	-7.96	310.3	46.0705	235.208	35.3	199.908	43.9295	15.33	0.0118557
200905061516	51.55	-8.01	306.9	48.0184	239.244	31.9	207.344	41.9816	16.05	0.0107455
200905061531	51.58	-8.05	304.3	50.0495	243.095	29.3	213.795	39.9505	15.23	0.0107016
200905061546	51.61	-8.1	310.4	52.1403	246.761	35.4	211.361	37.8597	15.69	0.0103975
200905061601	51.64	-8.15	302.4	54.2846	250.272	27.4	222.872	35.7154	15.12	0.0095043
200905061616	51.65	-8.17	221.6	56.4844	253.687	306.6	307.087	33.5156	13.48	0.00914063
200905061631	51.65	-8.17	220.5	58.7309	257.004	305.5	311.504	31.2691	13.73	0.0461221
200905061646	51.65	-8.17	298.4	61.0069	260.214	23.4	236.814	28.9931	14.45	0.0100208
200905061701	51.66	-8.18	271.6	63.2993	263.32	356.6	266.72	26.7007	15.69	0.00993125
200905061716	51.66	-8.2	263.6	65.5979	266.348	348.6	277.748	24.4021	14.87	0.0105103
200905061731	51.66	-8.21	263.3	67.9097	269.321	348.3	281.021	22.0903	15.43	0.0100393
200905061746	51.67	-8.23	261.9	70.2155	272.234	346.9	285.334	19.7845	15.17	0.0109448
200905061801	51.67	-8.24	43.9	72.5215	275.12	128.9	146.22	17.4785	15.64	0.0177514
200905061816	51.69	-8.21	42.3	74.8372	278.004	127.3	150.704	15.1628	14.66	0.166376
200905061831	51.71	-8.18	46.3	77.132	280.873	131.3	149.573	12.868	13.53	0.122378
200905061846	51.72	-8.15	47.4	79.4011	283.737	132.4	151.337	10.5989	14.97	0.179981
200905061901	51.74	-8.12	50.4	81.6323	286.603	135.4	151.203	8.36774	14.4	0.587151
200905061916	51.74	-8.1	221.9	83.8175	289.475	306.9	342.575	6.18253	13.63	0.387571
200905061931	51.74	-8.11	224.4	85.9244	292.342	309.4	342.942	4.0756	13.48	0.36532
200905080816	51.71	-8.29	223.5	60.1988	100.143	308.5	151.643	29.8012	11.06	0.49733
200905080831	51.68	-8.32	206.5	57.9355	103.324	291.5	171.824	32.0645	12.5	0.323407
200905080901	51.61	-8.37	203.6	53.4878	110.023	288.6	181.423	36.5122	11.21	0.278277
200905080916	51.58	-8.4	203.9	51.3305	113.575	288.9	184.675	38.6695	9.57	0.107466
200905081001	51.5	-8.45	251.3	45.2248	125.342	336.3	149.042	44.7752	12.45	0.0716582
200905081016	51.5	-8.46	252.8	43.3769	129.721	337.8	151.921	46.6231	11.99	0.128005
200905081031	51.5	-8.46	250.3	41.6414	134.359	335.3	159.059	48.3586	14.2	0.249283
200905081046	51.49	-8.5	250.2	40.0504	139.199	335.2	163.999	49.9496	13.99	0.164148
200905081101	51.49	-8.54	254.7	38.6183	144.314	339.7	164.614	51.3817	11.42	0.164161
200905081116	51.48	-8.59	254.7	37.3524	149.674	339.7	169.974	52.6476	13.53	0.0907447
200905081131	51.47	-8.64	255	36.2763	155.292	340	175.292	53.7237	13.27	0.0509525
200905081146	51.46	-8.68	250	35.4069	161.159	335	186.159	54.5931	13.94	0.106284
200905081216	51.44	-8.77	251.1	34.3642	173.413	336.1	197.313	55.6358	10.85	0.0325604
200905081231	51.43	-8.81	251.4	34.2124	179.698	336.4	203.298	55.7876	13.07	0.0571036
200905081301	51.42	-8.9	251.2	34.6764	192.199	336.2	215.999	55.3236	12.5	0.0253254
200905081316	51.41	-8.94	250.3	35.2725	198.295	335.3	222.995	54.7275	12.4	0.0321342
200905081331	51.4	-8.98	252	36.0993	204.204	337	227.204	53.9007	11.16	0.0151713
200905081346	51.39	-9.03	253.5	37.137	209.87	338.5	231.37	52.863	11.27	0.0346167
200905081401	51.39	-9.07	253.1	38.3808	215.289	338.1	237.189	51.6192	11.83	0.0314719
200905081431	51.37	-9.15	244.4	41.3571	225.337	329.4	255.937	48.6429	10.91	0.0165828
200905081446	51.37	-9.16	241.2	43.08	229.993	326.2	263.793	46.92	10.55	0.0190012
200905081501	51.37	-9.15	243.4	44.9316	234.422	328.4	266.022	45.0684	10.34	0.0169106
200905081516	51.37	-9.15	259.2	46.8807	238.605	344.2	254.405	43.1193	10.24	0.0207647
200905081531	51.37	-9.18	265.6	48.8999	242.544	350.6	251.944	41.1001	9.83	0.019611
200905081546	51.37	-9.21	263.5	50.9909	246.296	348.5	257.796	39.0091	9.88	0.0219119
200905081616	51.37	-9.27	265.7	55.3411	253.316	350.7	262.616	34.6589	9.41	0.0281633
200905081631	51.37	-9.3	265.1	57.5796	256.623	350.1	266.523	32.4204	10.65	0.036457
200905081646	51.37	-9.33	265.6	59.8484	259.82	350.6	269.22	30.1516	10.49	0.0470327
200905081701	51.37	-9.36	264.3	62.1394	262.921	349.3	273.621	27.8606	9.46	0.0611122
200905081716	51.37	-9.39	264.6	64.4452	265.943	349.6	276.343	25.5548	10.13	0.0758086
200905081731	51.37	-9.42	259.6	66.7591	268.899	344.6	284.299	23.2409	9.52	0.0378052
200905081746	51.36	-9.46	258.9	69.0686	271.798	343.9	287.898	20.9314	10.08	0.0799956
200905081801	51.36	-9.49	260.6	71.3798	274.659	345.6	289.059	18.6202	11.63	0.0803294
200905081816	51.36	-9.52	259.9	73.6802	277.49	344.9	292.59	16.3198	8.13	0.106075
200905081831	51.36	-9.55	261.3	75.9637	280.301	346.3	294.001	14.0363	7.36	0.0834881
200905081846	51.35	-9.59	259.8	78.22	283.096	344.8	298.296	11.78	8.38	0.0821218
200905081901	51.35	-9.63	280.3	80.4442	285.887	5.3	280.587	9.5558	8.13	0.0652856
200905081931	51.36	-9.69	281.5	84.7713	291.514	6.5	285.014	5.22868	9.36	0.0735885
200905081946	51.36	-9.72	278.8	86.837	294.358	3.8	290.558	3.163	9.62	0.0731063
200905082001	51.37	-9.75	281	88.7745	297.233	6	291.233	1.22552	9.52	0.0973159
200905082016	51.38	-9.78	281	90.5059	300.144	6	294.144	-0.505947	8.74	0.130666
200905082031	51.38	-9.81	280.5	92.6969	303.099	5.5	297.599	-2.69693	14.15	0.0920847
200905090946	51.29	-9.56	76.3	47.4413	119.633	161.3	318.333	42.5587	6.43	0.0708344
200905091001	51.3	-9.49	67.8	45.4137	123.815	152.8	331.015	44.5863	6.79	0.0818972
200905091016	51.31	-9.43	66.3	43.4916	128.222	151.3	336.922	46.5084	5.86	0.258057
200905091031	51.34	-9.38	37.1	41.7053	132.891	122.1	10.7907	48.2947	6.43	0.183513
200905091046	51.38	-9.35	35	40.0731	137.813	120	17.8129	49.9269	5.76	0.193691
200905091101	51.4	-9.31	261.5	38.5793	143.013	346.5	156.513	51.4207	5.66	0.167292
200905091116	51.4	-9.32	250	37.2625	148.408	335	173.408	52.7375	5.09	0.293896
200905091146	51.4	-9.33	250.5	35.222	160.003	335.5	184.503	54.778	3.91	0.220351
200905091216	51.41	-9.27	72.7	34.1057	172.545	157.7	14.8446	55.8943	4.42	0.0315689
200905091246	51.44	-9.14	72.9	34.0509	185.548	157.9	27.6485	55.9491	5.66	0.392006
200905091301	51.45	-9.07	74.2	34.4211	191.992	159.2	32.7917	55.5789	4.73	0.0108581
200905091316	51.45	-9.07	217.6	35.0267	198.181	302.6	255.581	54.9733	5.09	0.0146924
200905091331	51.45	-9.07	219.7	35.8683	204.176	304.7	259.476	54.1317	3.86	0.0154838
200905091346	51.45	-9.07	215.4	36.9285	209.933	300.4	269.533	53.0715	4.06	0.0145204
200905091401	51.45	-9.06	61.7	38.1911	215.439	146.7	68.7393	51.8089	4.94	0.00796974
200905091416	51.47	-8.99	57.9	39.6721	220.733	142.9	77.8325	50.3279	5.4	0.00854133
200905091431	51.48	-8.95	67.7	41.293	225.707	152.7	73.0067	48.707	5.56	0.00903431
200905091446	51.49	-8.91	70.3	43.052	230.407	155.3	75.1072	46.948	5.56	0.00921117
200905091501	51.5	-8.88	71.5	44.9249	234.839	156.5	78.3389	45.0751	6.53	0.00980421
200905091516	51.51	-8.84	71.9	46.9041	239.045	156.9	82.1455	43.0959	6.53	0.146413
200905091531	51.52	-8.8	71	48.9691	243.037	156	87.0369	41.0309	6.28	0.0142755
200905091546	51.52	-8.79	216.8	51.0845	246.814	301.8	305.014	38.9155	6.64	0.191099
200905091601	51.52	-8.79	217.6	53.2533	250.412	302.6	307.812	36.7467	6.89	0.271721
200905091616	51.52	-8.79	215.6	55.4701	253.863	300.6	313.263	34.5299	7.36	0.263775
200905091631	51.52	-8.79	209.4	57.725	257.186	294.4	322.786	32.275	7.72	0.212167
200905091646	51.52	-8.76	79.3	60.0276	260.423	164.3	96.1228	29.9724	7.15	0.288051
200905091701	51.53	-8.73	79.2	62.3527	263.559	164.2	99.3591	27.6473	6.74	0.2105
200905091716	51.53	-8.7	80.1	64.6901	266.621	165.1	101.521	25.3099	7.05	0.376068
200905091731	51.53	-8.68	79.2	67.0279	269.61	164.2	105.41	22.9721	6.74	0.293453
200905091746	51.54	-8.65	81.2	69.3715	272.55	166.2	106.35	20.6285	7	0.073045
200905091801	51.54	-8.62	80.5	71.7086	275.455	165.5	109.955	18.2914	6.94	0.0156516
200905091816	51.54	-8.59	79.9	74.0329	278.33	164.9	113.43	15.9671	6.12	0.0438469
200905091831	51.55	-8.56	74.8	76.3361	281.185	159.8	121.385	13.6639	6.69	0.0261762
200905091846	51.55	-8.53	68.3	78.6146	284.035	153.3	130.735	11.3854	7.2	0.00838401
200905091901	51.56	-8.51	58	80.8508	286.876	143	143.876	9.14924	6.84	0.00861628
200905091916	51.57	-8.48	57.8	83.0489	289.734	142.8	146.934	6.95111	6.64	0.00755058
200905091931	51.57	-8.46	68.8	85.1873	292.605	153.8	138.805	4.81271	6.64	0.007323
200905091946	51.58	-8.43	68.2	87.2443	295.508	153.2	142.308	2.75575	6.48	0.075711
200905101101	51.08	-7.32	136.3	37.3464	145.471	221.3	284.171	52.6536	5.14	0.00865875
200905101216	50.91	-7.08	133.7	33.2119	176.216	218.7	317.516	56.7881	4.27	0.010113
200905101346	50.69	-6.79	138.1	36.8008	214.03	223.1	350.93	53.1992	8.8	0.0115009
200905101401	50.66	-6.74	138.1	38.2156	219.508	223.1	356.408	51.7844	8.13	0.009378
200905101416	50.62	-6.69	138.1	39.7987	224.688	223.1	1.58823	50.2013	8.85	0.00894573
200905101431	50.59	-6.64	137.4	41.5427	229.562	222.4	7.16199	48.4573	9.36	0.0108943
200905101446	50.55	-6.6	139	43.408	234.15	224	10.1496	46.592	10.75	0.0150326
200905101501	50.52	-6.55	140.1	45.3979	238.479	225.1	13.3786	44.6021	11.01	0.0103205
200905101516	50.48	-6.5	139.8	47.4791	242.577	224.8	17.777	42.5209	10.75	0.0114385
200905101531	50.44	-6.45	139.6	49.6422	246.46	224.6	21.8603	40.3578	10.75	0.0117938
200905101546	50.41	-6.41	140	51.8707	250.136	225	25.1359	38.1293	10.03	0.0109646
200905101601	50.37	-6.36	140.1	54.1571	253.661	225.1	28.5612	35.8429	9.36	0.0113132
200905101616	50.34	-6.31	140.4	56.4909	257.034	225.4	31.6339	33.5091	9.1	0.0115504
200905101701	50.24	-6.16	140.2	63.664	266.479	225.2	41.2793	26.336	9.36	0.0172781
200905101716	50.2	-6.12	140	66.08	269.453	225	44.4535	23.92	8.44	0.0198172
200905101731	50.17	-6.07	140.4	68.5066	272.371	225.4	46.9711	21.4934	7.56	0.0567822
200905101746	50.13	-6.02	146.9	70.9309	275.246	231.9	43.346	19.0691	7.72	0.0158197
200905101816	50.04	-6.01	177.5	75.6928	280.839	262.5	18.3386	14.3072	8.33	0.0159895
200905101831	49.99	-6.01	177.8	78.0439	283.607	262.8	20.8071	11.9561	9.1	0.0207381
200905101846	49.94	-6.01	181.9	80.3675	286.372	266.9	19.4717	9.63253	8.13	0.0189851
200905101901	49.91	-5.96	89.1	82.6778	289.176	174.1	115.076	7.32224	5.81	0.0214124
200905101916	49.91	-5.88	88.7	84.9409	292.016	173.7	118.316	5.05907	5.61	0.0216976
200905101931	49.91	-5.81	88.3	87.1144	294.876	173.3	121.576	2.88556	7.41	0.0311394
200905101946	49.9	-5.73	88.8	89.1469	297.779	173.8	123.979	0.853107	6.12	0.0830095
200905102001	49.9	-5.65	90.7	90.9837	300.725	175.7	125.025	-0.983736	6.07	0.119178
200905102016	49.9	-5.57	90.8	93.5701	303.72	175.8	127.92	-3.57013	6.38	0.118892
200905110846	49.89	-2.38	74.5	50.9341	110.295	159.5	310.795	39.0659	12.91	0.099862
200905110901	49.9	-2.31	73.7	48.6583	114.007	158.7	315.307	41.3417	16.46	0.0815672
200905110916	49.91	-2.25	79.4	46.4557	117.91	164.4	313.51	43.5443	15.84	0.0837196
200905110931	49.92	-2.2	72.8	44.34	122.029	157.8	324.229	45.66	13.01	0.131596
200905110946	49.93	-2.14	72.1	42.3162	126.413	157.1	329.313	47.6838	11.57	0.15775
200905111001	49.94	-2.08	72.4	40.4083	131.079	157.4	333.679	49.5917	13.43	0.221504
200905111016	49.95	-2.02	72.3	38.6369	136.05	157.3	338.75	51.3631	12.86	0.273059
200905111031	49.96	-1.96	71.9	37.0244	141.345	156.9	344.445	52.9756	10.75	0.361141
200905111046	49.97	-1.9	74.2	35.5952	146.971	159.2	347.771	54.4048	10.29	0.339347
200905111101	49.98	-1.85	72.8	34.3772	152.909	157.8	355.109	55.6228	10.65	0.174354
200905111116	49.98	-1.79	74.7	33.3794	159.16	159.7	359.46	56.6206	12.45	0.313658
200905111131	49.99	-1.74	75.6	32.6478	165.658	160.6	5.05846	57.3522	12.45	0.316678
200905111146	50	-1.69	73.3	32.1889	172.348	158.3	14.0476	57.8111	12.55	0.166944
200905111201	50.01	-1.64	72.9	32.015	179.142	157.9	21.2421	57.985	13.89	0.0886785
200905111216	50.01	-1.6	71.5	32.1201	185.93	156.5	29.43	57.8799	12.76	0.155255
200905111231	50.02	-1.56	70.7	32.5202	192.631	155.7	36.931	57.4798	13.94	0.184044
200905111246	50.03	-1.52	68.3	33.1942	199.158	153.3	45.8578	56.8058	13.27	0.487032
200905111301	50.04	-1.49	74.2	34.1219	205.424	159.2	46.2242	55.8781	13.01	0.370865
200905111316	50.04	-1.45	74.4	35.278	211.422	159.4	52.0222	54.722	12.55	0.300055
200905111331	50.05	-1.41	75.2	36.6537	217.093	160.2	56.8935	53.3463	13.89	0.337521
200905111346	50.06	-1.38	73.7	38.2108	222.422	158.7	63.7222	51.7892	14.2	0.285325
200905111401	50.06	-1.35	78.5	39.9218	227.439	163.5	63.9388	50.0782	12.71	0.263498
200905111416	50.07	-1.32	77.9	41.7783	232.142	162.9	69.2419	48.2217	12.45	0.265712
200905111431	50.07	-1.29	77.3	43.7469	236.571	162.3	74.2713	46.2531	13.53	0.325546
200905111446	50.08	-1.27	77	45.815	240.724	162	78.7244	44.185	14.35	0.295389
200905111501	50.08	-1.24	78.1	47.967	244.667	163.1	81.5672	42.033	13.99	0.246766
200905111516	50.09	-1.21	76.9	50.1922	248.398	161.9	86.498	39.8078	12.29	0.2671
200905111531	50.09	-1.17	80.6	52.476	251.967	165.6	86.367	37.524	13.01	0.321565
200905111546	50.1	-1.14	77.8	54.8018	255.364	162.8	92.5639	35.1982	14.81	0.372528
200905111601	50.1	-1.11	77.1	57.16	258.634	162.1	96.5343	32.84	15.02	0.226372
200905111616	50.11	-1.08	77	59.5461	261.785	162	99.7847	30.4539	16.46	0.790442
200905111631	50.11	-1.04	75.1	61.9552	264.853	160.1	104.753	28.0448	14.4	0.249208
200905111646	50.12	-1.01	74.8	64.3692	267.829	159.8	108.029	25.6308	14.61	0.301144
200905111701	50.13	-0.97	73.2	66.7928	270.75	158.2	112.55	23.2072	14.92	0.34717
200905111716	50.13	-0.93	75.3	69.2135	273.624	160.3	113.324	20.7865	15.74	0.285324
200905111731	50.14	-0.89	75.5	71.6244	276.456	160.5	115.956	18.3756	13.32	0.27599
200905111746	50.15	-0.85	74.6	74.0192	279.262	159.6	119.662	15.9808	15.33	0.289172
200905111801	50.15	-0.81	75.4	76.3937	282.056	160.4	121.656	13.6063	12.4	0.289145
200905111816	50.16	-0.77	76.8	78.7373	284.842	161.8	123.042	11.2627	14.87	0.312348
200905111831	50.16	-0.73	72.1	81.047	287.634	157.1	130.534	8.95299	16.98	0.0941231
200905111846	50.17	-0.69	68.7	83.3071	290.438	153.7	136.738	6.6929	16.1	0.179861
200905111901	50.17	-0.65	68.9	85.5084	293.265	153.9	139.365	4.49157	17.13	0.237566
200905111916	50.18	-0.62	67.7	87.6068	296.113	152.7	143.413	2.39323	15.33	0.129199
200905111931	50.18	-0.59	60	89.5384	298.998	145	153.998	0.461601	14.66	0.127916
200905111946	50.19	-0.56	60.4	91.3677	301.926	145.4	156.526	-1.36767	17.59	0.570161
200905120716	50.3	0.07	53.4	63.3786	93.2323	138.4	314.832	26.6214	19.39	0.678111
200905120731	50.3	0.08	54.1	60.9864	96.2281	139.1	317.128	29.0136	17.85	0.205749
200905120746	50.31	0.1	57.2	58.603	99.3226	142.2	317.123	31.397	17.85	0.10754
200905120916	50.33	0.21	57	45.0792	120.704	142	338.704	44.9208	18.72	0.116998
200905130831	52.58	3.92	52.8	50.0819	114.449	137.8	336.649	39.9181	10.65	0.0469566
200905130846	52.61	3.98	52.7	48.022	118.39	137.7	340.69	41.978	10.7	0.0529013
200905130901	52.64	4.05	52	46.0376	122.543	137	345.543	43.9624	10.85	0.0506003
200905130916	52.67	4.11	23.4	44.154	126.907	108.4	18.5066	45.846	10.96	0.0708607
200905130931	52.71	4.14	23	42.4022	131.482	108	23.4815	47.5978	10.39	0.043071
200905130946	52.76	4.17	22.2	40.7861	136.316	107.2	29.1162	49.2139	8.13	0.0331966
200905131001	52.8	4.2	14.6	39.3101	141.404	99.6	41.8041	50.6899	10.91	0.0336196
200905131016	52.84	4.23	25.3	38.0004	146.756	110.3	36.4561	51.9996	11.99	0.0325394
200905131031	52.88	4.27	28.9	36.8736	152.379	113.9	38.4792	53.1264	11.01	0.0288908
200905131046	52.92	4.31	28.6	35.9526	158.239	113.6	44.6392	54.0474	11.57	0.0266785
200905131101	52.96	4.34	27.9	35.2562	164.285	112.9	51.3851	54.7438	11.57	0.0257089
200905131116	52.99	4.37	28.6	34.7857	170.481	113.6	56.881	55.2143	11.47	0.0278372
200905131131	53.02	4.41	29	34.5602	176.789	114	62.7889	55.4398	10.65	0.0260544
200905131146	53.06	4.44	28.6	34.5955	183.106	113.6	69.5063	55.4045	10.7	0.0365118
200905131201	53.1	4.48	29.4	34.8806	189.394	114.4	74.9937	55.1194	10.8	0.291017
200905131216	53.14	4.52	28.1	35.4087	195.568	113.1	82.4679	54.5913	10.7	0.262966
200905131231	53.18	4.55	27.9	36.1655	201.556	112.9	88.6563	53.8345	12.24	0.272879
200905131246	53.22	4.58	23.2	37.1363	207.332	108.2	99.132	52.8637	12.45	0.232873
200905131301	53.26	4.61	30.5	38.3027	212.866	115.5	97.3659	51.6973	13.32	0.0333359
200905131316	53.29	4.64	30.5	39.6372	218.15	115.5	102.65	50.3628	13.27	0.0428219
200905131331	53.33	4.67	29.5	41.1361	223.166	114.5	108.666	48.8639	13.53	0.263522
200905131346	53.37	4.7	33.1	42.7718	227.926	118.1	109.826	47.2282	14.25	0.0523143
200905131401	53.39	4.75	63.2	44.523	232.482	148.2	84.2821	45.477	14.45	0.028327
200905131416	53.41	4.81	63.9	46.3842	236.82	148.9	87.92	43.6158	14.09	0.0177799
200905131431	53.42	4.87	65.5	48.3301	240.954	150.5	90.4537	41.6699	13.73	0.0162989
200905131446	53.44	4.93	66.6	50.3568	244.888	151.6	93.2876	39.6432	13.79	0.0148056
200905131501	53.45	4.99	66.1	52.4423	248.657	151.1	97.557	37.5577	13.53	0.0125104
200905131516	53.47	5.05	68.7	54.5828	252.267	153.7	98.5672	35.4172	13.63	0.0128662
200905131531	53.48	5.11	66.3	56.7612	255.751	151.3	104.451	33.2388	13.94	0.0120951
200905131546	53.5	5.17	67.4	58.9736	259.113	152.4	106.713	31.0264	14.4	0.0126271
200905131601	53.51	5.23	68.4	61.2069	262.381	153.4	108.981	28.7931	13.68	0.0122151
200905131616	53.52	5.3	70.5	63.4617	265.575	155.5	110.075	26.5383	13.58	0.0228416
200905131631	53.54	5.36	69.1	65.7188	268.685	154.1	114.585	24.2812	13.58	0.0238488
200905131646	53.55	5.43	72.8	67.9821	271.752	157.8	113.952	22.0179	12.09	0.0185098
200905131701	53.56	5.49	72.1	70.234	274.766	157.1	117.666	19.766	14.04	0.0193526
200905131716	53.57	5.56	74.6	72.4797	277.755	159.6	118.155	17.5203	13.63	0.0215351
200905131731	53.59	5.63	71	74.705	280.718	156	124.718	15.295	13.07	0.0230365
200905131746	53.6	5.7	70.9	76.9067	283.671	155.9	127.771	13.0933	12.86	0.026717
200905131801	53.61	5.77	72.2	79.0763	286.621	157.2	129.421	10.9237	13.48	0.0355843
200905131816	53.63	5.84	71.8	81.203	289.574	156.8	132.774	8.797	13.32	0.0291805
200905131831	53.64	5.91	70.5	83.2834	292.542	155.5	137.042	6.71658	13.12	0.0224773
200905131846	53.65	5.99	68.8	85.3065	295.537	153.8	141.737	4.69348	13.53	0.027735
200905131901	53.67	6.06	70.9	87.2334	298.552	155.9	142.652	2.76659	13.12	0.0404458
200905131916	53.68	6.14	69.8	89.0312	301.608	154.8	146.808	0.968818	12.96	0.0348155
200905131931	53.7	6.21	69.8	90.6245	304.696	154.8	149.896	-0.624513	13.01	0.0305572
200905131946	53.71	6.29	71.1	92.6754	307.838	156.1	151.738	-2.67541	12.76	0.0311148
200905132001	53.73	6.37	70.1	94.8558	311.029	155.1	155.929	-4.85576	11.88	0.0349558
200905132016	53.74	6.45	73.4	96.5337	314.272	158.4	155.872	-6.53374	11.68	0.0482428
200905132031	53.75	6.53	72.6	98.0998	317.572	157.6	159.972	-8.0998	11.32	0.0460604
										min
										max
										mean
