# Supplementary figures and images for: Sunglint Detection for Unmanned and Automated Platforms
Source: MDPI journal article supplement (doi:10.3390/s120912545), 2012-09-13

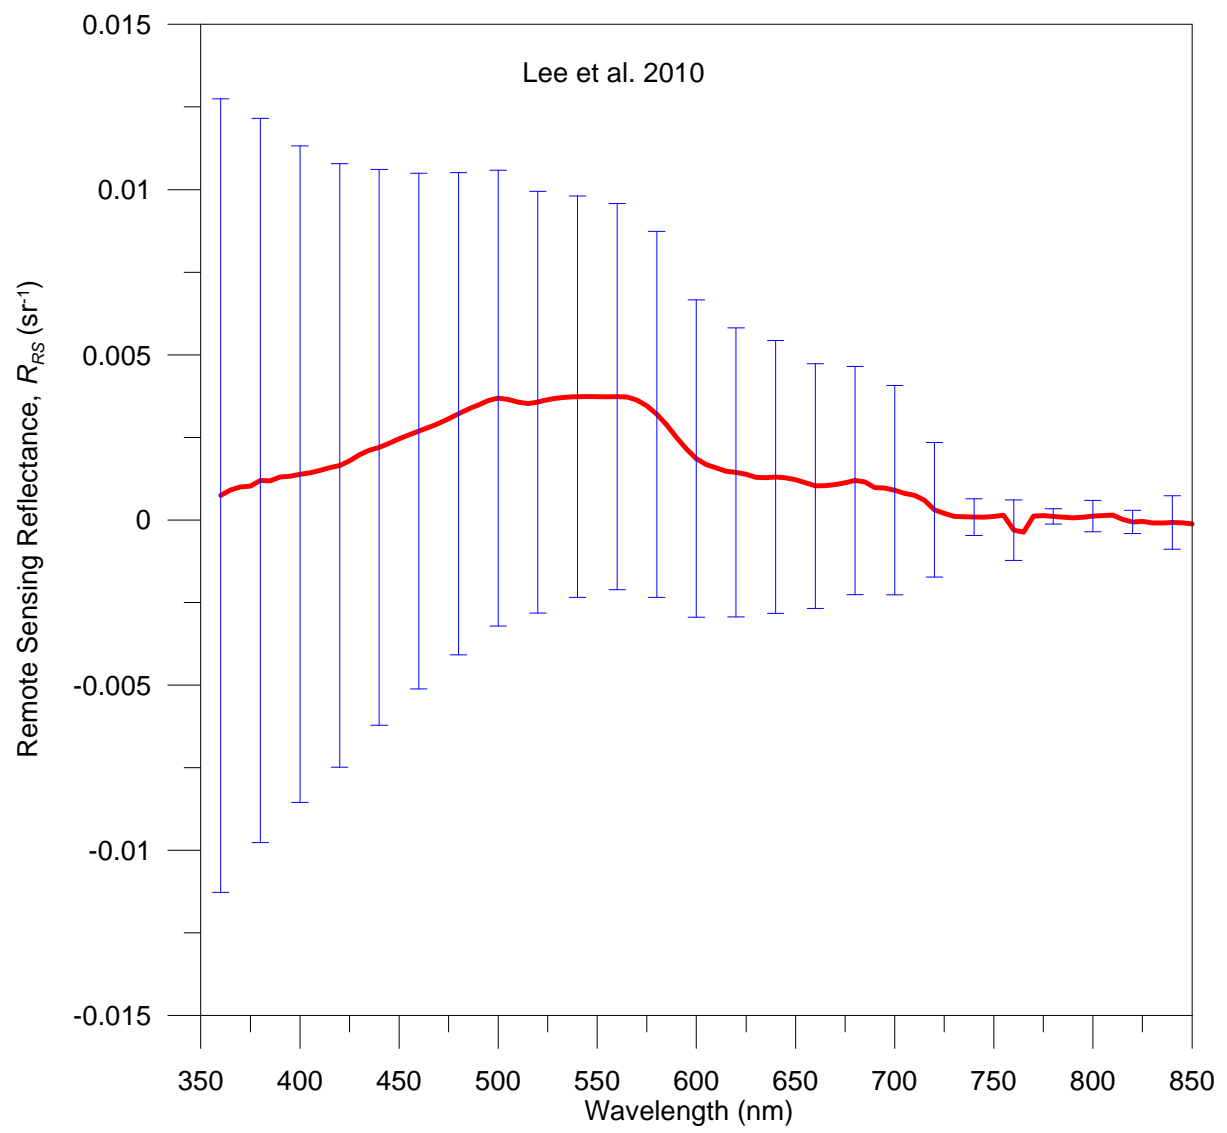

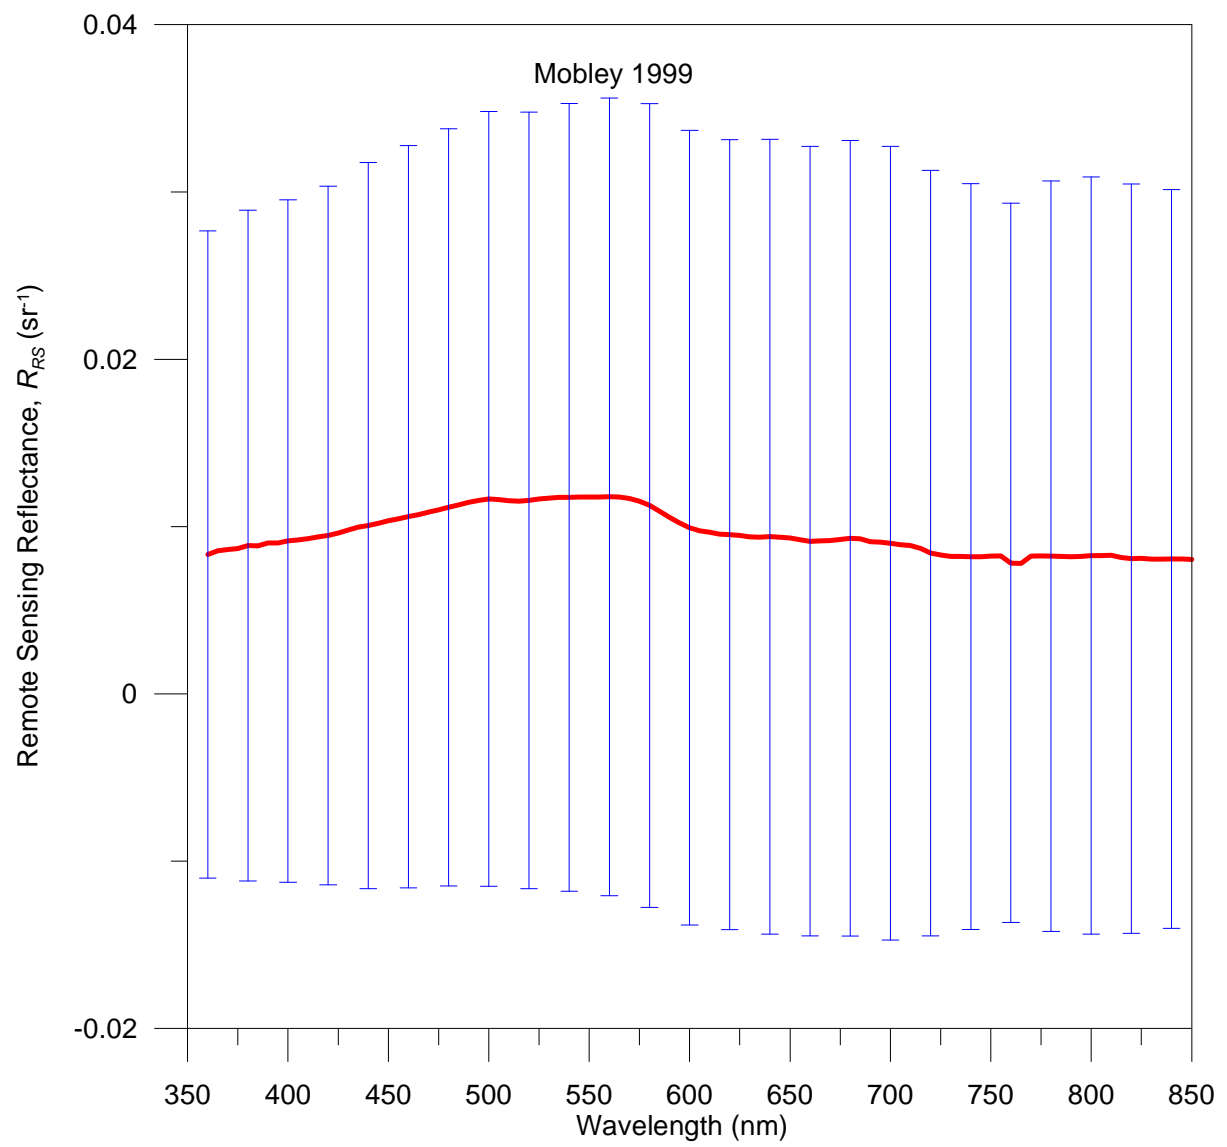

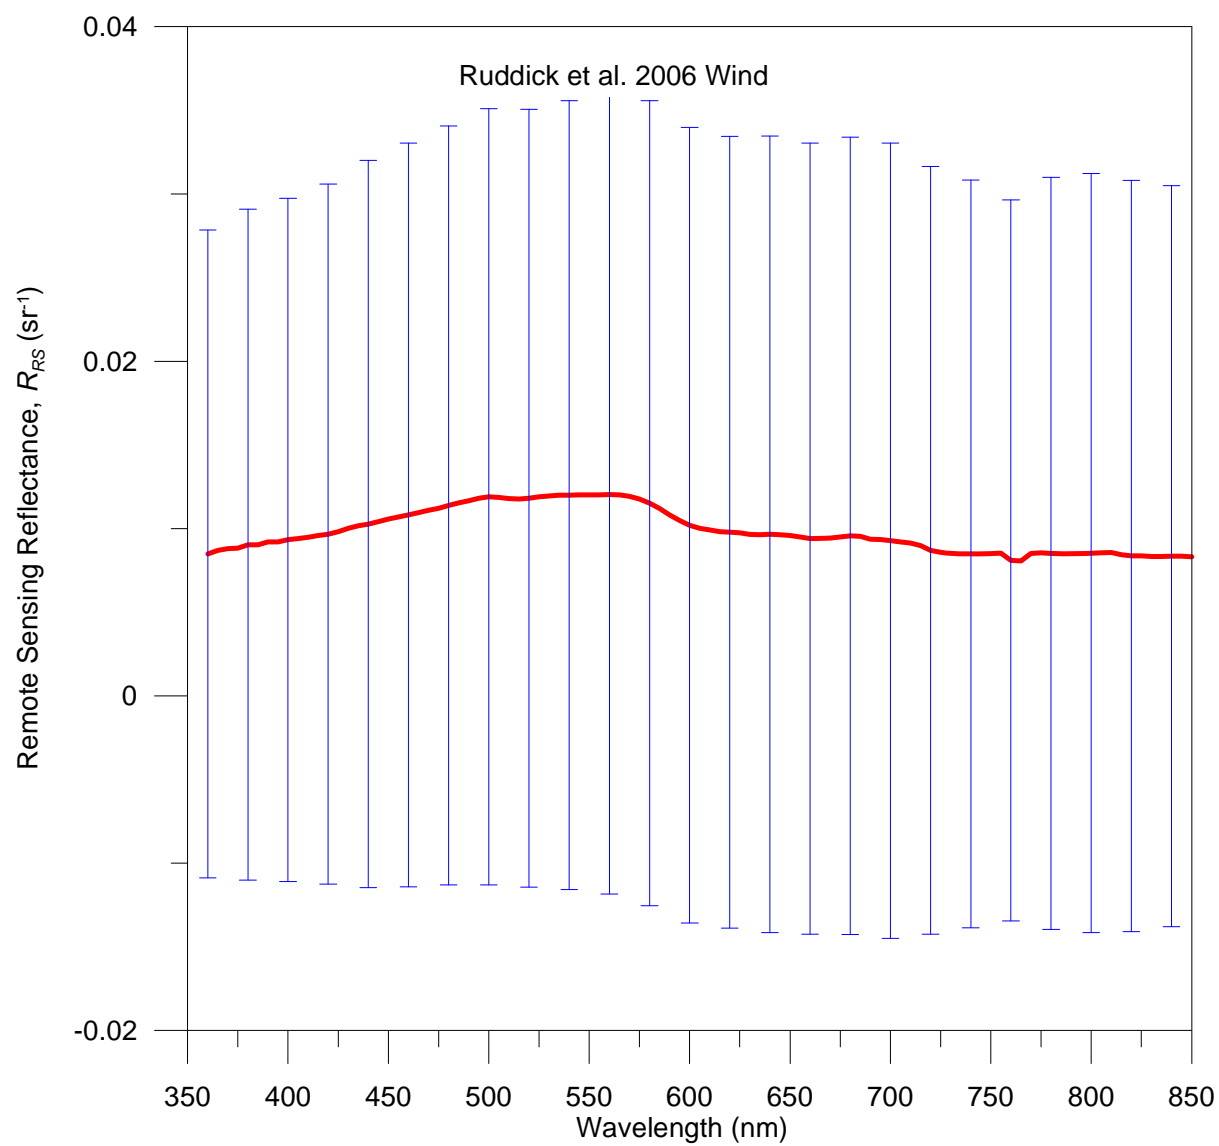

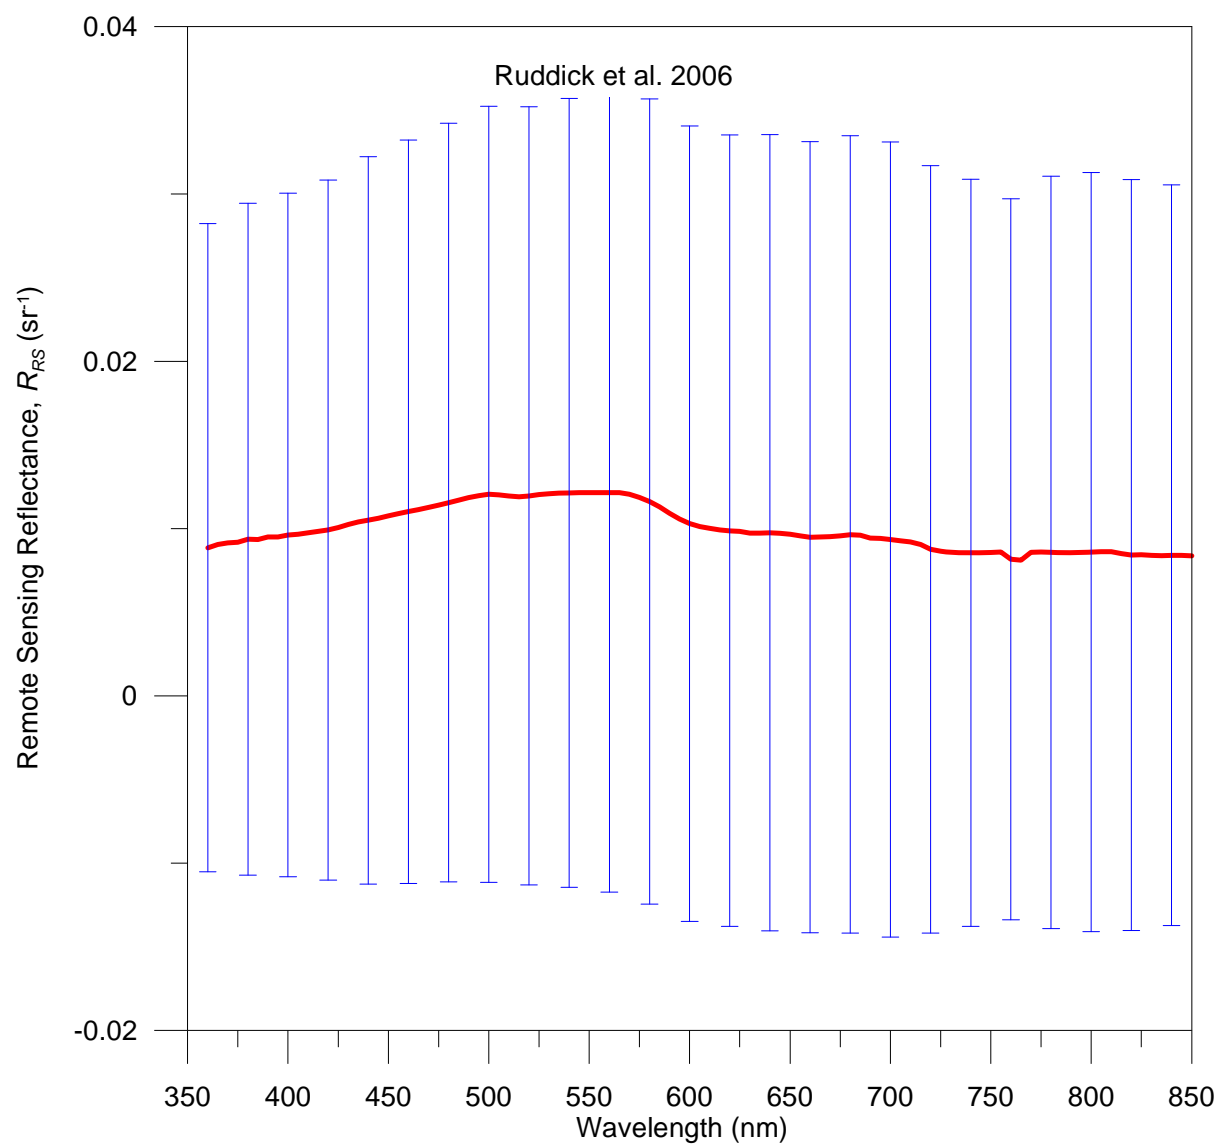

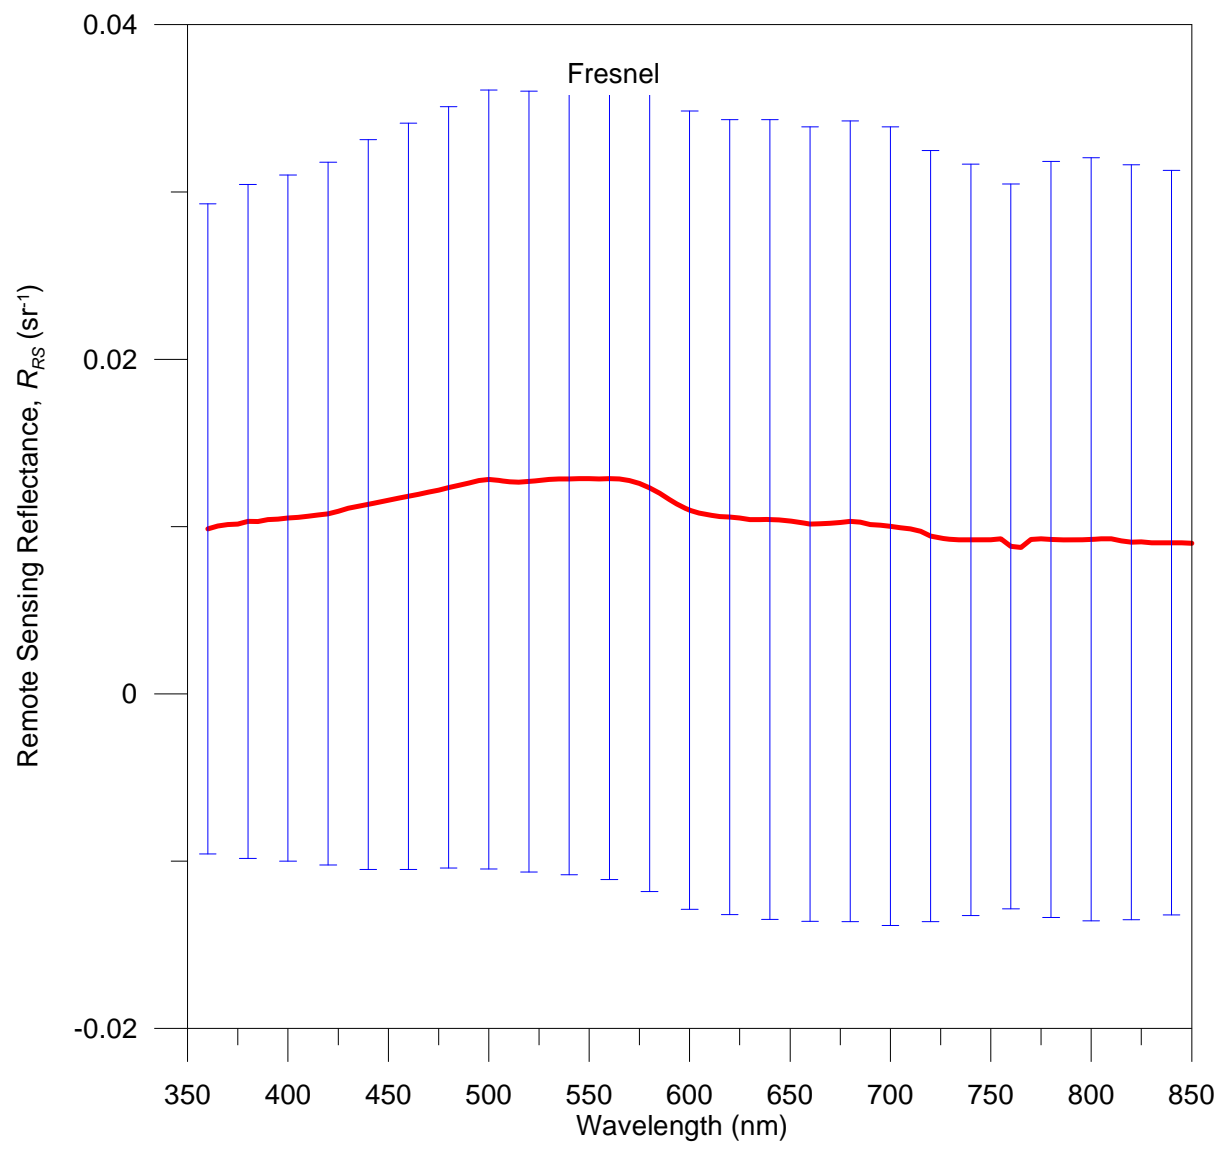

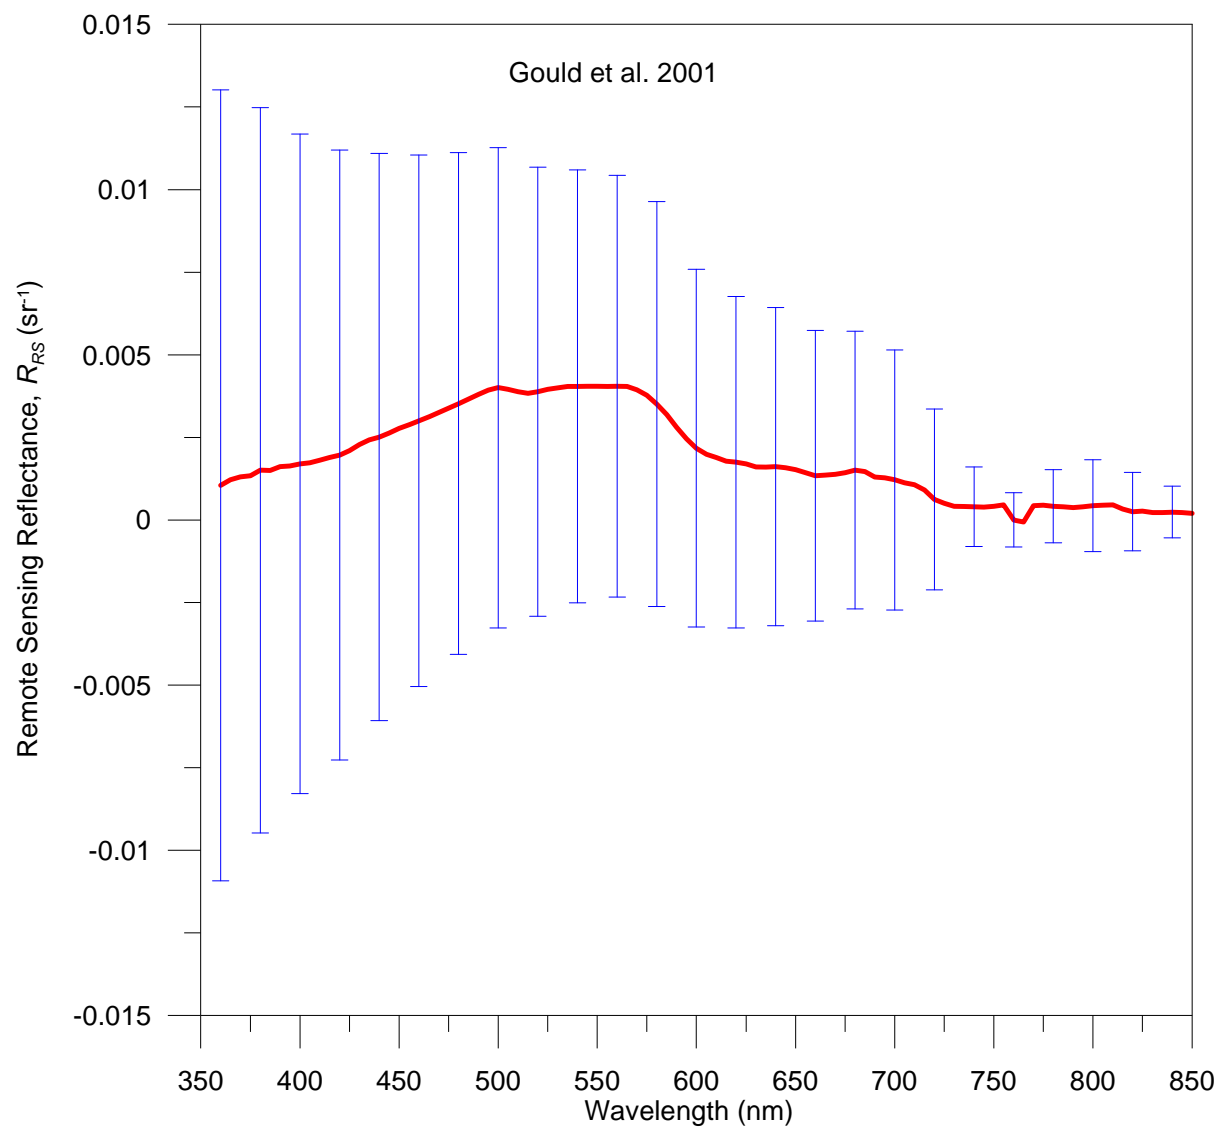

Supplement: s1 [file s1]
